# Supplementary material for: United Kingdom Diabetic Retinopathy Electronic Medical Record (UK DR EMR) Users Group: report 4, real-world data on the impact of deprivation on the presentation of diabetic eye disease at hospital services
Source: PubMed Central journal article supplement (PMC6582816; doi:10.1136/bjophthalmol-2018-312568), 2018-09-29
Supplement: bjophthalmol-2018-312568supp001.pdf [file bjophthalmol-2018-312568supp001.pdf]

## Appendix 1:

### Sites from the UK DR EMR Users Group contributing to Report 4

| <b>NHS Trust Site</b>                                          | <b>Investigator</b>     |
|----------------------------------------------------------------|-------------------------|
| Barking, Havering and Redbridge University Hospitals NHS Trust | Bobby Paul              |
| Bart's Health NHS Trust                                        | Sudeshna Patra          |
| Belfast Health and Social Care Trust                           | Usha Chakravarthy       |
| Bradford Teaching Hospitals NHS Foundation Trust               | Faruque Ghanchi         |
| Calderdale and Huddersfield NHS Foundation Trust               | Rehna Khan              |
| Frimley Park Hospital NHS Foundation Trust                     | Geeta Menon             |
| Hinchingbrooke Health Care NHS Trust                           | Toks Akerele            |
| Hull and East Yorkshire Hospitals NHS Foundation Trust         | Louise Downey           |
| King's College Hospital NHS Foundation Trust                   | Haralabos Eleftheriadis |
| Leeds Teaching Hospitals NHS Trust                             | Raj Mukherjee           |
| Mid Yorkshire Hospitals NHS Trust                              | Narendra Dhingra        |
| Moorfields Eye Centre at Bedford Hospital                      | Aires Lobo              |
| Moorfields Eye Centre at Croydon University Hospital           | Dawn Sim                |
| Northern Devon Healthcare NHS Trust                            | Elizabeth Wilkinson     |
| Royal United Hospital Bath NHS Trust                           | Richard Antcliff        |
| Sandwell and West Birmingham Hospitals NHS Trust               | Randhir Chavan          |
| Sheffield Teaching Hospitals NHS Foundation Trust              | Chris Brand             |
| The Newcastle Upon Tyne Hospitals NHS Foundation Trust         | James Talks             |
| University Hospital Southampton NHS Foundation Trust           | Andrew Lotery           |
| University Hospitals Birmingham NHS Foundation Trust           | Helen Palmer            |
| University Hospitals Bristol NHS Foundation Trust              | Clare Bailey            |
| Wirral University Teaching Hospital NHS Foundation Trust       | Vineeth Kumar           |
